134. Brown KA, Laferriere A, Lakheeram I, Moss IR: Recurrent hypoxemia in children is associated with increased analgesic sensitivity to opiates. *ANESTHESIOLOGY* 2006; 105:665-9
135. Taylor S, Kirton OC, Staff I, Kozol RA: Postoperative day one: A high risk period for respiratory events. *Am J Surg* 2005; 190:752-6
136. Etches RC: Respiratory depression associated with patient-controlled analgesia: A review of eight cases. *Can J Anaesth* 1994; 41:125-32
137. Turner K, VanDenkerkhof E, Lam M, Mackillop W: Perioperative care of patients with obstructive sleep apnea: A survey of Canadian anesthesiologists. *Can J Anaesth* 2006; 53:299-304
138. Isono S, Tanaka A, Nishino T: Lateral position decreases collapsibility of the passive pharynx in patients with obstructive sleep apnea. *ANESTHESIOLOGY* 2002; 97:780-5
139. Isono S, Tanaka A, Ishikawa T, Tagaito Y, Nishino T: Sniffing position improves pharyngeal airway patency in anesthetized patients with obstructive sleep apnea. *ANESTHESIOLOGY* 2005; 103:489-94
140. Rennotte MT, Baele P, Aubert G, Rodenstein DO: Nasal continuous positive airway pressure in the perioperative management of patients with obstructive sleep apnea submitted to surgery. *Chest* 1995; 107:367-74
141. Gupta RM, Parvizi J, Hanssen AD, Gay PC: Postoperative complications in patients with obstructive sleep apnea syndrome undergoing hip or knee replacement: A case-control study. *Mayo Clin Proc* 2001; 76:897-905
142. Rosenberg-Adamsen S, Lie C, Bernhard A, Kehlet H, Rosenberg J: Effect of oxygen treatment on heart rate after abdominal surgery. *ANESTHESIOLOGY* 1999; 90:380-4
143. Jones JG, Jordan C, Scudder C, Rocke DA, Barrowcliffe M: Episodic postoperative oxygen desaturation: The value of added oxygen. *J R Soc Med* 1985; 78:1019-22

## ■ ANESTHESIOLOGY REFLECTIONS

### Fries Apparatus for Artificial Respiration

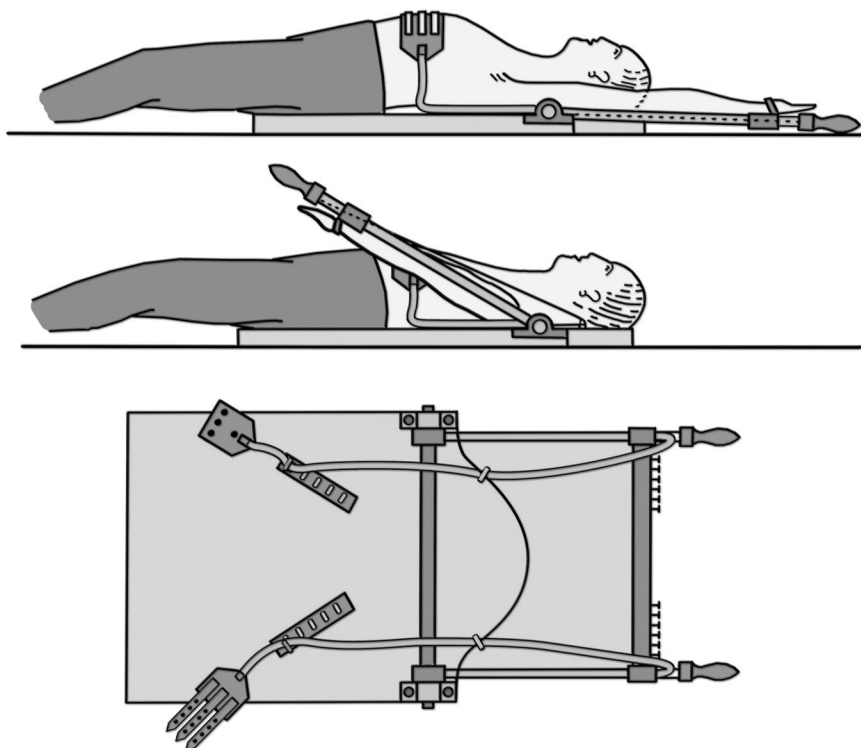

Swedish citizen K. A. E. Fries of Stockholm filed in 1911 for a U.S. Patent on his "Apparatus for Producing Artificial Respiration." He hoped to resuscitate individuals "nearly drowned or suffocated by smoke, gas, or steam, or who for some other reason are in need of artificial respiration." Patterned loosely after the supine method of Silvester, the Fries approach shifted the victim's arm positions to exert "pressure on a proper part of the person's chest." Using the Fries Apparatus (as depicted above, from the Wood Library-Museum Archives) "one person, even an inexperienced one," could "without exertion perform the same amount of work for a long time as two or more practiced persons . . ." Granted in 1913, US Patent 1,057,633 mentioned that the Fries Apparatus might "also be used for gymnastic purposes." (Copyright © the American Society of Anesthesiologists, Inc. This image appears in the *Anesthesiology Reflections* online collection available at [www.anesthesiology.org](http://www.anesthesiology.org).)

*George S. Bause, M.D., M.P.H., Honorary Curator, ASA's Wood Library-Museum of Anesthesiology, Park Ridge, Illinois, and Clinical Associate Professor, Case Western Reserve University, Cleveland, Ohio. UJYC@aol.com.*
